# Supplementary material for: Nutritional Status Predicts Fatty Acid Uptake from Fish and Soybean Oil Supplements for Treatment of Cancer-Related Fatigue: Results from a Phase II Nationwide Study
Source: MDPI journal article supplement (doi:10.3390/nu14010184), 2021-12-31
Supplement: s1 [file s1]

**Nutritional status predicts fatty acid uptake from fish and soybean oil supplements for treatment of cancer-related fatigue: Results from a phase II nationwide study**  
Kleckner et al.

*Supplementary Table S1. Associations between baseline nutritional status and change in fatigue as measured using the Multidimensional Fatigue Symptom Inventory-Short Form (MFSI; analysis of variance, n=80).*

|                | Good nutritional<br>status (n=55) |         | Light-moderate<br>malnutrition (n=25) |         | F-test  |
|----------------|-----------------------------------|---------|---------------------------------------|---------|---------|
| MFSI subscales | Mean                              | Std Dev | Mean                                  | Std Dev | p-value |
| General        | -3.33                             | 5.41    | -3.88                                 | 6.17    | 0.686   |
| Physical       | -2.84                             | 3.86    | -1.56                                 | 3.76    | 0.171   |
| Emotional      | -0.76                             | 3.23    | -1.96                                 | 3.69    | 0.146   |
| Mental         | -1.45                             | 3.33    | -1.24                                 | 2.49    | 0.774   |
| Vigor          | 4.07                              | 3.71    | 2.92                                  | 5.76    | 0.285   |
| Total Fatigue  | -12.46                            | 12.93   | -11.56                                | 15.48   | 0.788   |
